# Supplementary material for: CD38 Deficiency Alleviates D-Galactose-Induced Myocardial Cell Senescence Through NAD+/Sirt1 Signaling Pathway
Source: PubMed Central journal article supplement (PMC6735286; doi:10.3389/fphys.2019.01125), 2019-09-03

**Figure S1**

**A**

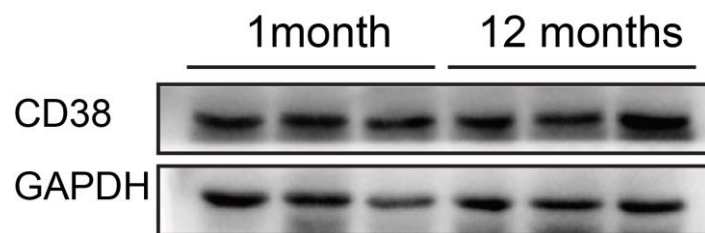

**B**

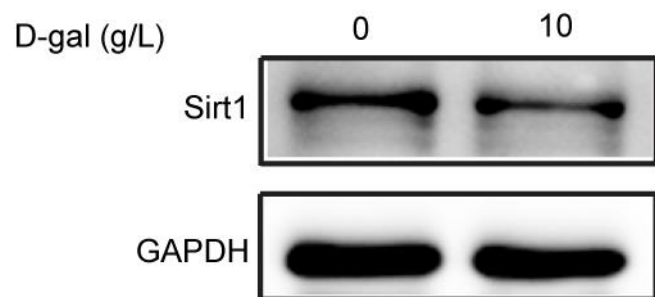

**C**

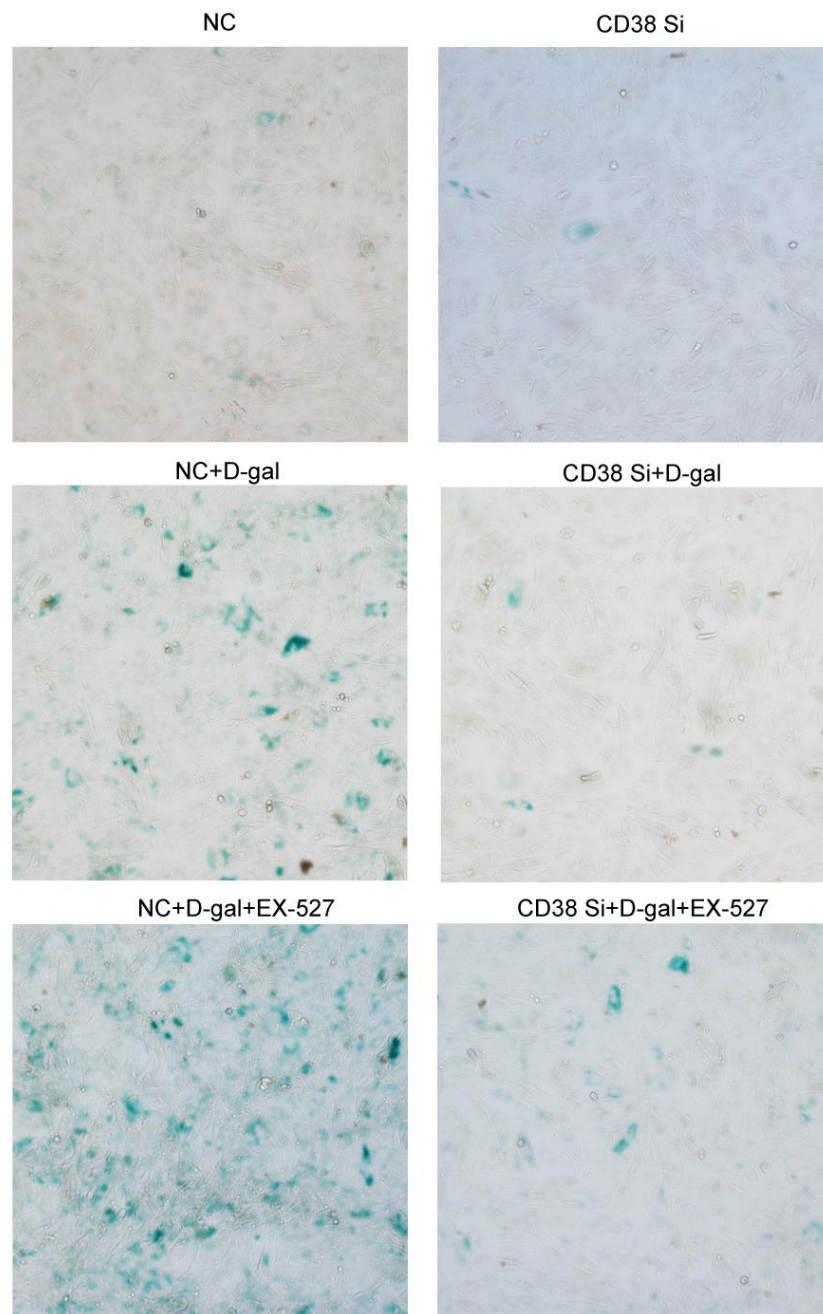

**D**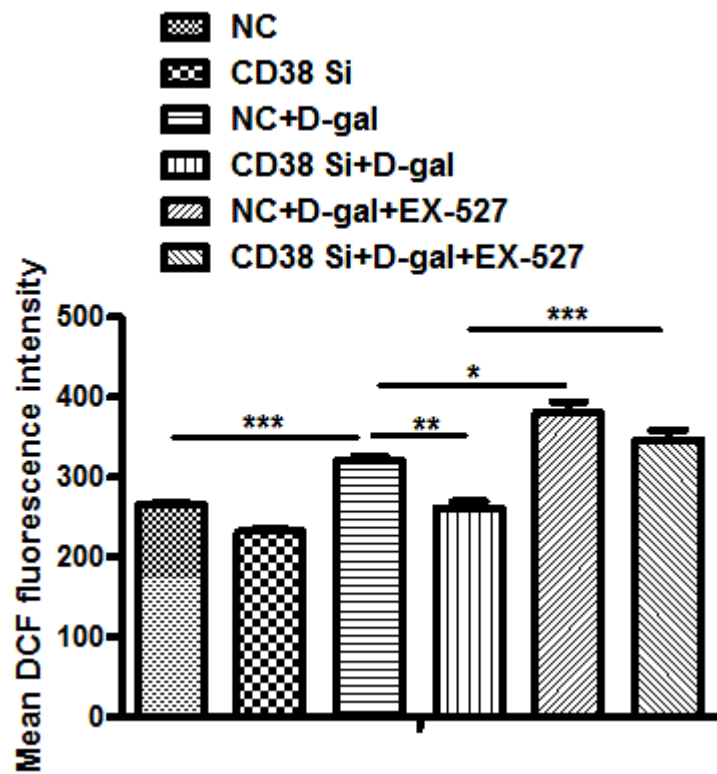**E**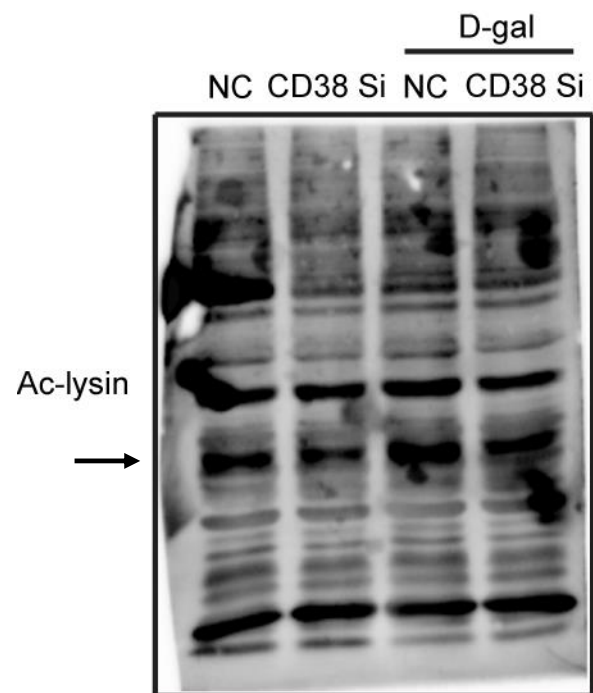

Supplement: Image_1.pdf [file Image_1.pdf]
